# Supplementary material
Source: PubMed Central journal article supplement (PMC3512032)
Supplement: mmc1.pdf [file mmc1.pdf]

# **Molecular Analysis of Arp2/3 Complex Activation in Cells**

Brian J. Galletta,<sup>†</sup> Anders E. Carlsson,<sup>‡</sup> and John A. Cooper<sup>†\*</sup>

<sup>†</sup>Department of Cell Biology and Physiology and <sup>‡</sup>Department of Physics, Washington University, Saint Louis, Missouri

Galletta et al.

Arp2/3 Activation in Cells

*Submitted August 15, 2012, and accepted for publication October 11, 2012.*

Correspondence: [jcooper@wustl.edu](mailto:jcooper@wustl.edu)

## Supplementary Information

**Figure S1.** Histograms of the rates and durations of the linear phases of assembly and disassembly of Arc35 and Cap1 in wild-type, *las17 $\Delta$ acidic myo5 $\Delta$ acidic* and *las17 $\Delta$ acidic myo3 $\Delta$ acidic myo5 $\Delta$ acidic* cells. These plots were generated from the data in Figures 2 and 3.

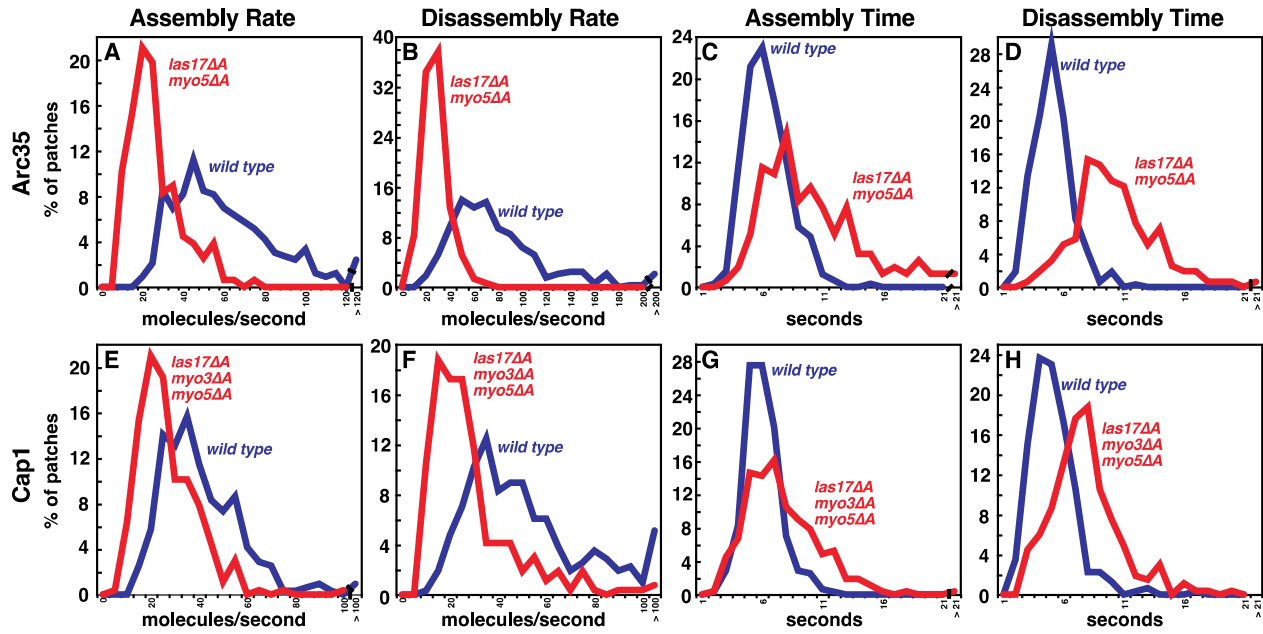

**Figure S2.** Histograms of the rates and durations of the linear phases of assembly and disassembly of Arc35, Cap1 and Abp1 in wild type and *las17Δacidic* cells. These plots were generated from the data in Figure 4.

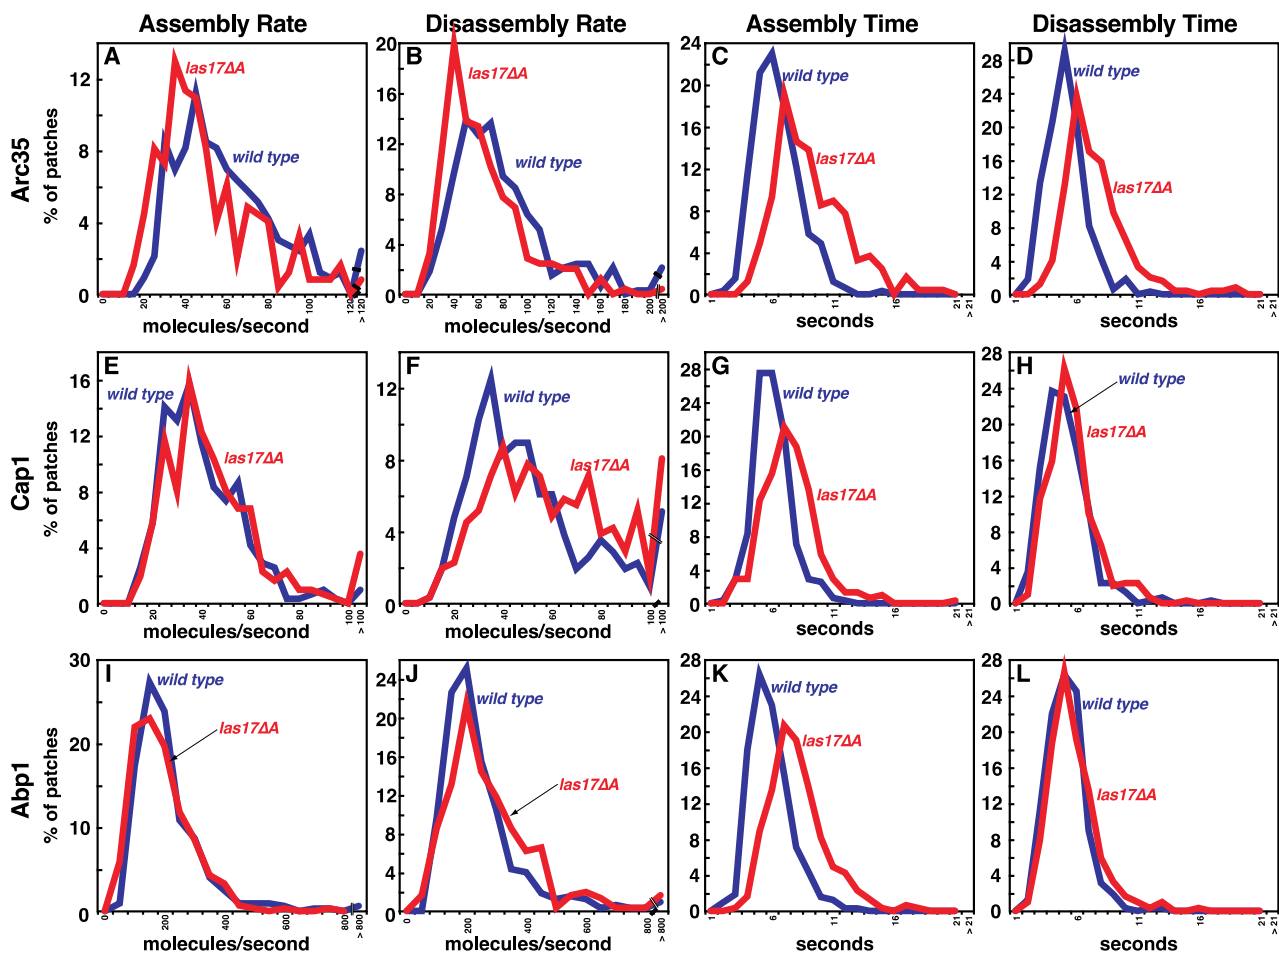

**Figure S3.** Histograms of the rates and durations of the linear phases of assembly and disassembly of Arc35, Cap1 and Abp1 in wild type and *myo3 $\Delta$ acidic myo5 $\Delta$ acidic* cells. These plots were generated from the data in Figure 5.

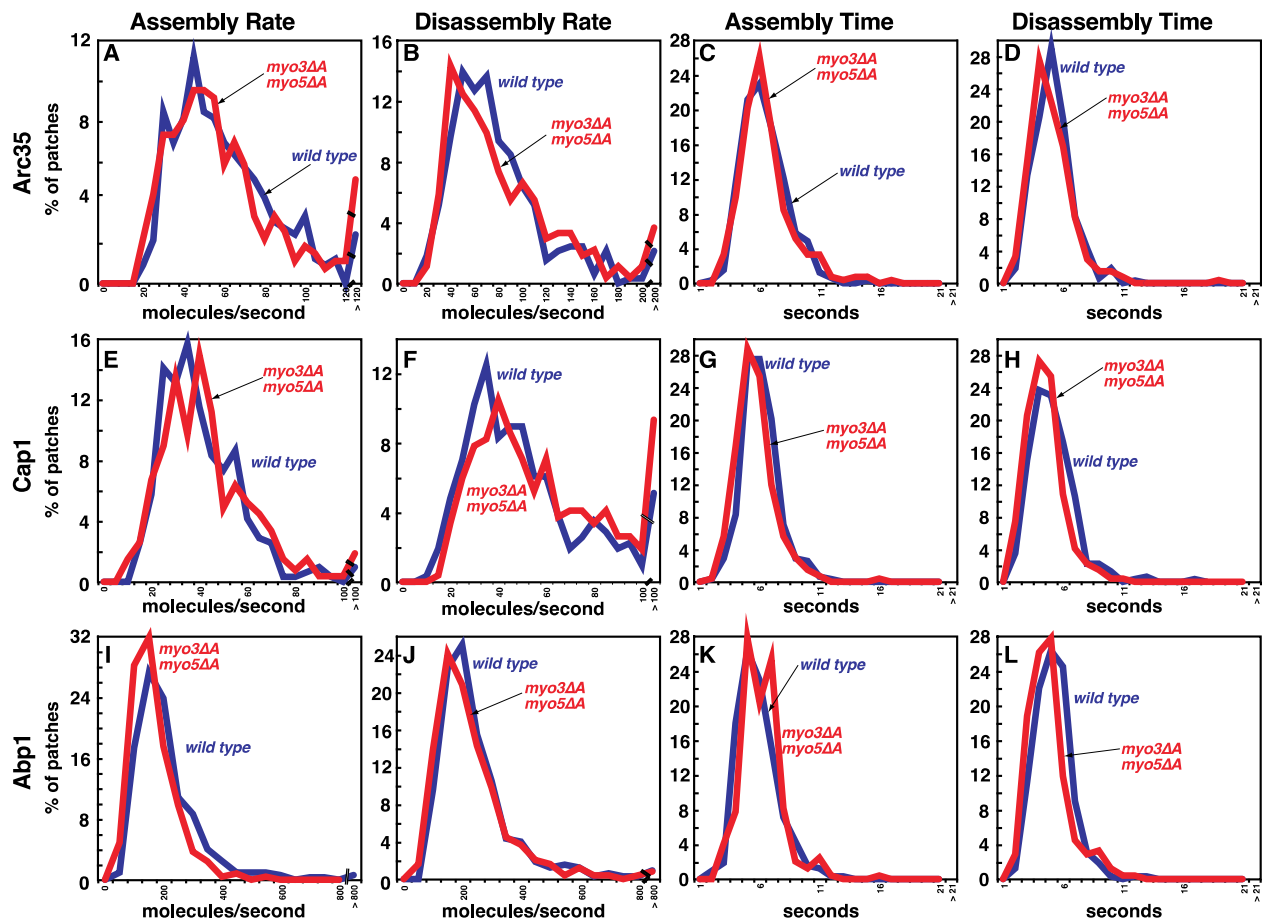

**Figure S4.** Assembly of Arp2/3 complex as GFP-Arc35 (A-F), Capping protein as GFP-Cap1 (G-L) and F-actin as GFP-Abp1 (M-R) in wild type (blue) and *pan1Δacidic* (red) cells. Data are from 3 segregants of each genotype. Panels as follows: (A, G, M) The number of molecules of the GFP-labeled protein per patch versus time. Plots were generated from data aligned at the maximal (peak) value for each patch and the mode of the distribution at each time point is presented. Error bars are  $\pm$  standard error of the mode. (B, H, N) Histograms of the peak number of molecules per patch. (C, I, O) Histograms of the rates of assembly. (D, J, P) Histograms of the rates of disassembly. (E, K, Q) Histograms of the duration of the assembly phase. (F, L, R) Histograms of the duration of the disassembly phase. Strain numbers and numbers of patches analyzed were as follows. Wild type data are from Figures 2 and 3. Arc35-GFP: *pan1Δacidic*, YJC7102-3, N = 121, 123. Cap1-GFP: *pan1Δacidic*, YJC7024-6, N = 83, 82, 90. Abp1-GFP: *pan1Δacidic*, YJC6958-60, N = 115, 103, 152. Cse4-GFP: YJC6725-6.

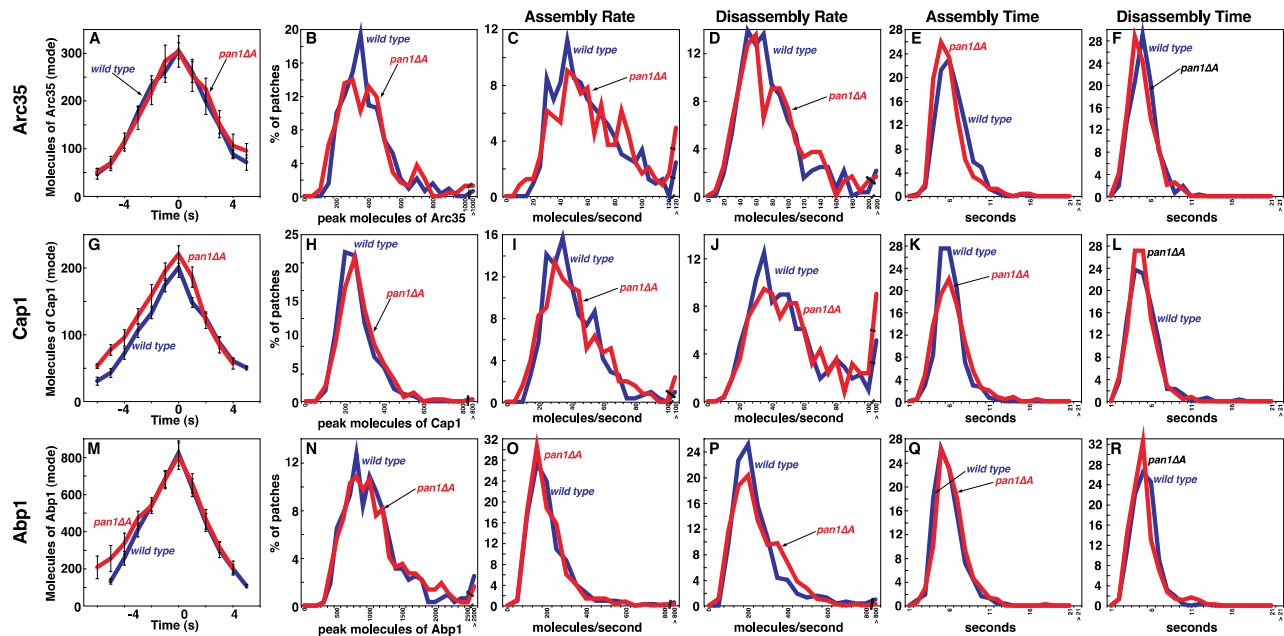

**Figure S5.** Histograms of the rates and durations of the linear phases of assembly and disassembly of Arc35, Cap1 and Abp1 in wild type and *las17Δacidic pan1Δacidic* cells. These plots were generated from the data in Figure 6.

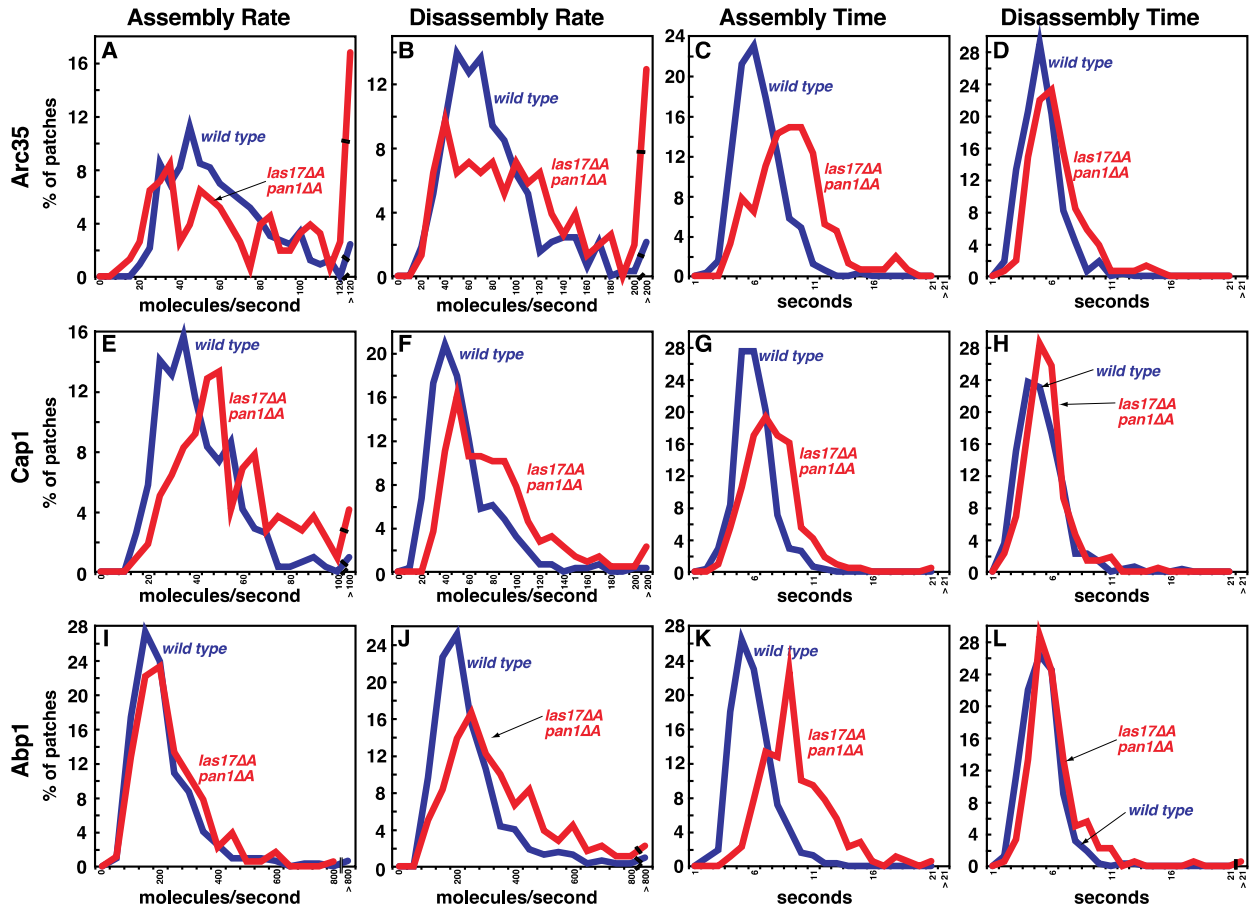

**Figure S6.** Histograms of the rates and durations of the linear phases of assembly and disassembly of Arc35, Cap1 and Abp1 in wild type and *myo3 $\Delta$ acidic myo5 $\Delta$ acidic pan1 $\Delta$ acidic* cells. These plots were generated from the data in Figure 7.

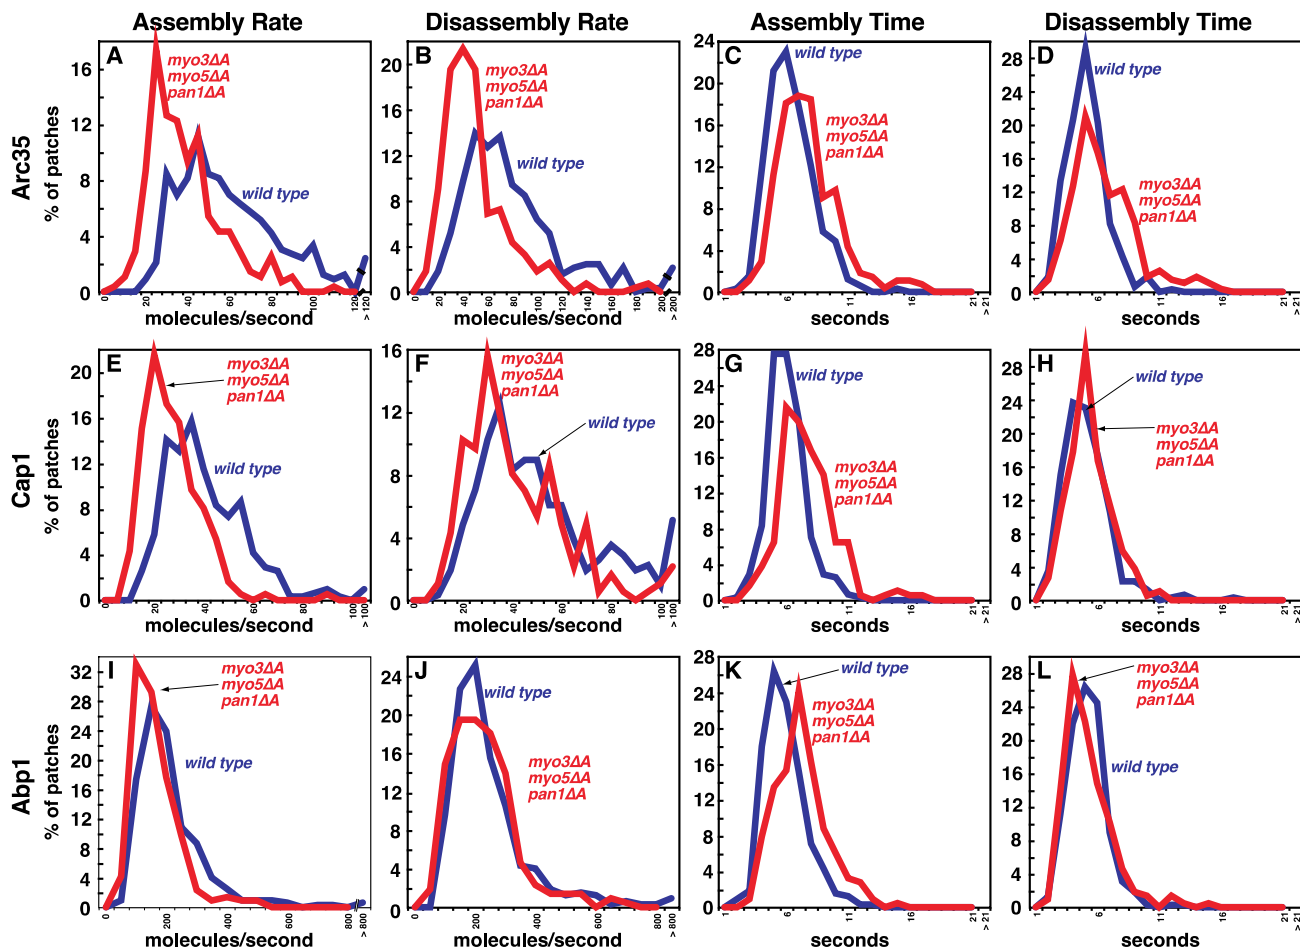

**Figure S7.** Quantitative analysis of actin patch motility in cells lacking the acidic Arp2/3-binding regions of Myo3, Myo5 and Pan1. Cells express Abp1-GFP. (A) MSD plots for wild-type (blue) and mutant patches (red) aligned at the start (left) or end (right) of their lifetimes. The curves on the left are truncated at the median lifetime. (B) Percentage of patches that leave the origin. Mean of values for three segregants is shown. (C) Average time at the origin, from the appearance of a patch until it moved away or disappeared. (D) Phase III movement only. For each patch, data prior to the time the patch traveled 200 nm were removed. Only patches that moved more than 200 nm from the origin were included. Wild type data are replotted from (23). Strain numbers and numbers of patches: *myo3Δacidic myo5Δacidic pan1Δacidic*, YJC7310-2, N = 68, 59, 109. Error bars are  $\pm$  one standard error.

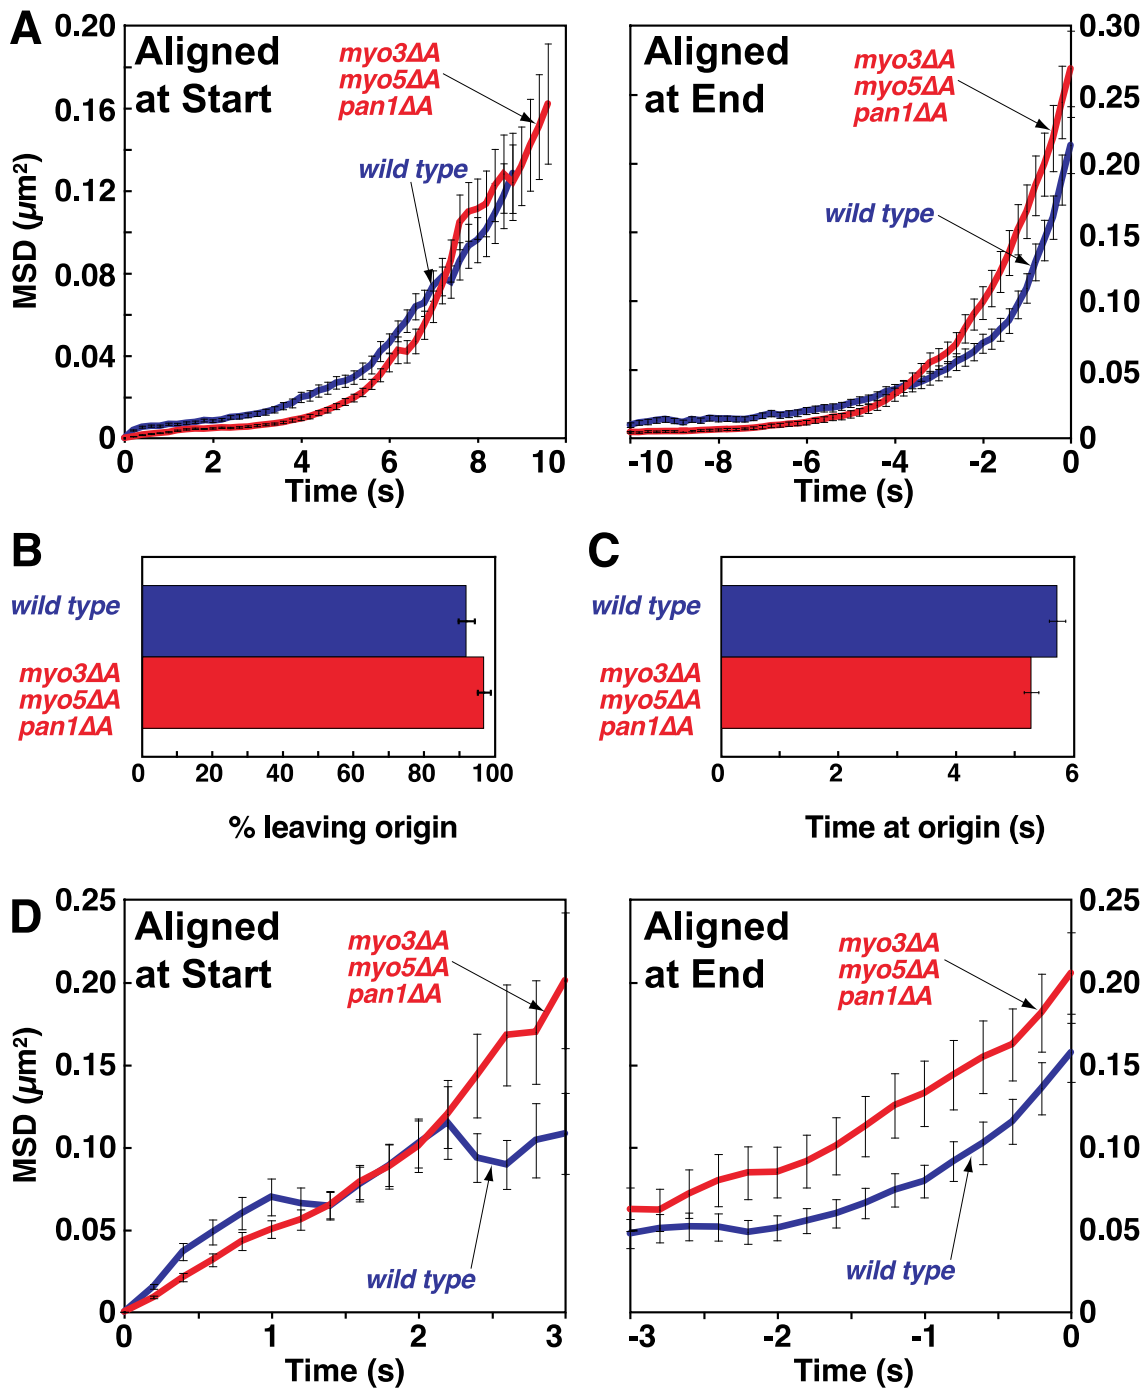



**Figure S8.** Localization of acidic domain mutants to patches. Representative micrographs of cells expressing GFP fusions of the Arp2/3 regulator mutants used in this study. GFP fusion proteins are expressed from their endogenous locus. (A) Las17 $\Delta$ acidic-GFP (YJC7440) (B) Myo3 $\Delta$ acidic-GFP (YJC7453) (C) Myo5 $\Delta$ acidic-GFP (YJC7458) (D) Pan1 $\Delta$ acidic-GFP (YJC7430). Scale bar = 5  $\mu$ m.

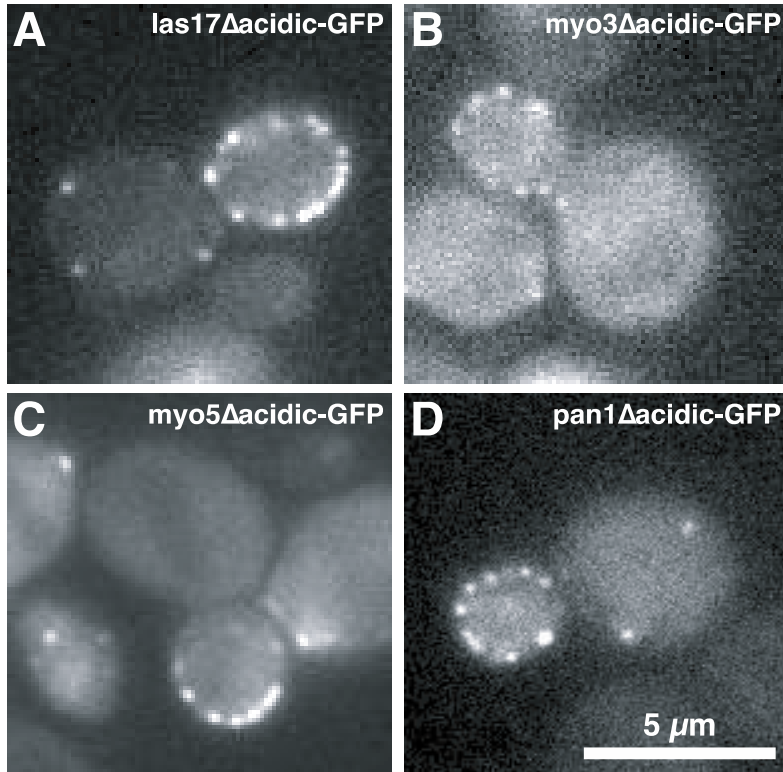

**Figure S9.** A summary of the changes in actin patch composition and behavior in Arp2/3 regulator mutants reported in this study. (A) Number of Arp2/3 complexes, assayed by Arc35-GFP, vs. time. (B) Number of CP, assayed by Cap1-GFP, vs. time. (C) Amount of F-actin, assayed by the number of Abp1-GFP molecules, vs. time. (A-C) Aligned at peak number of molecules. (D, E) MSD plots of Abp1-GFP movement, aligned at the beginning of patch lifetimes (D) or the end of patch lifetime (E). Error bars have been removed for ease of viewing. Data in panel D and E are reproduced from our previous publication (1).

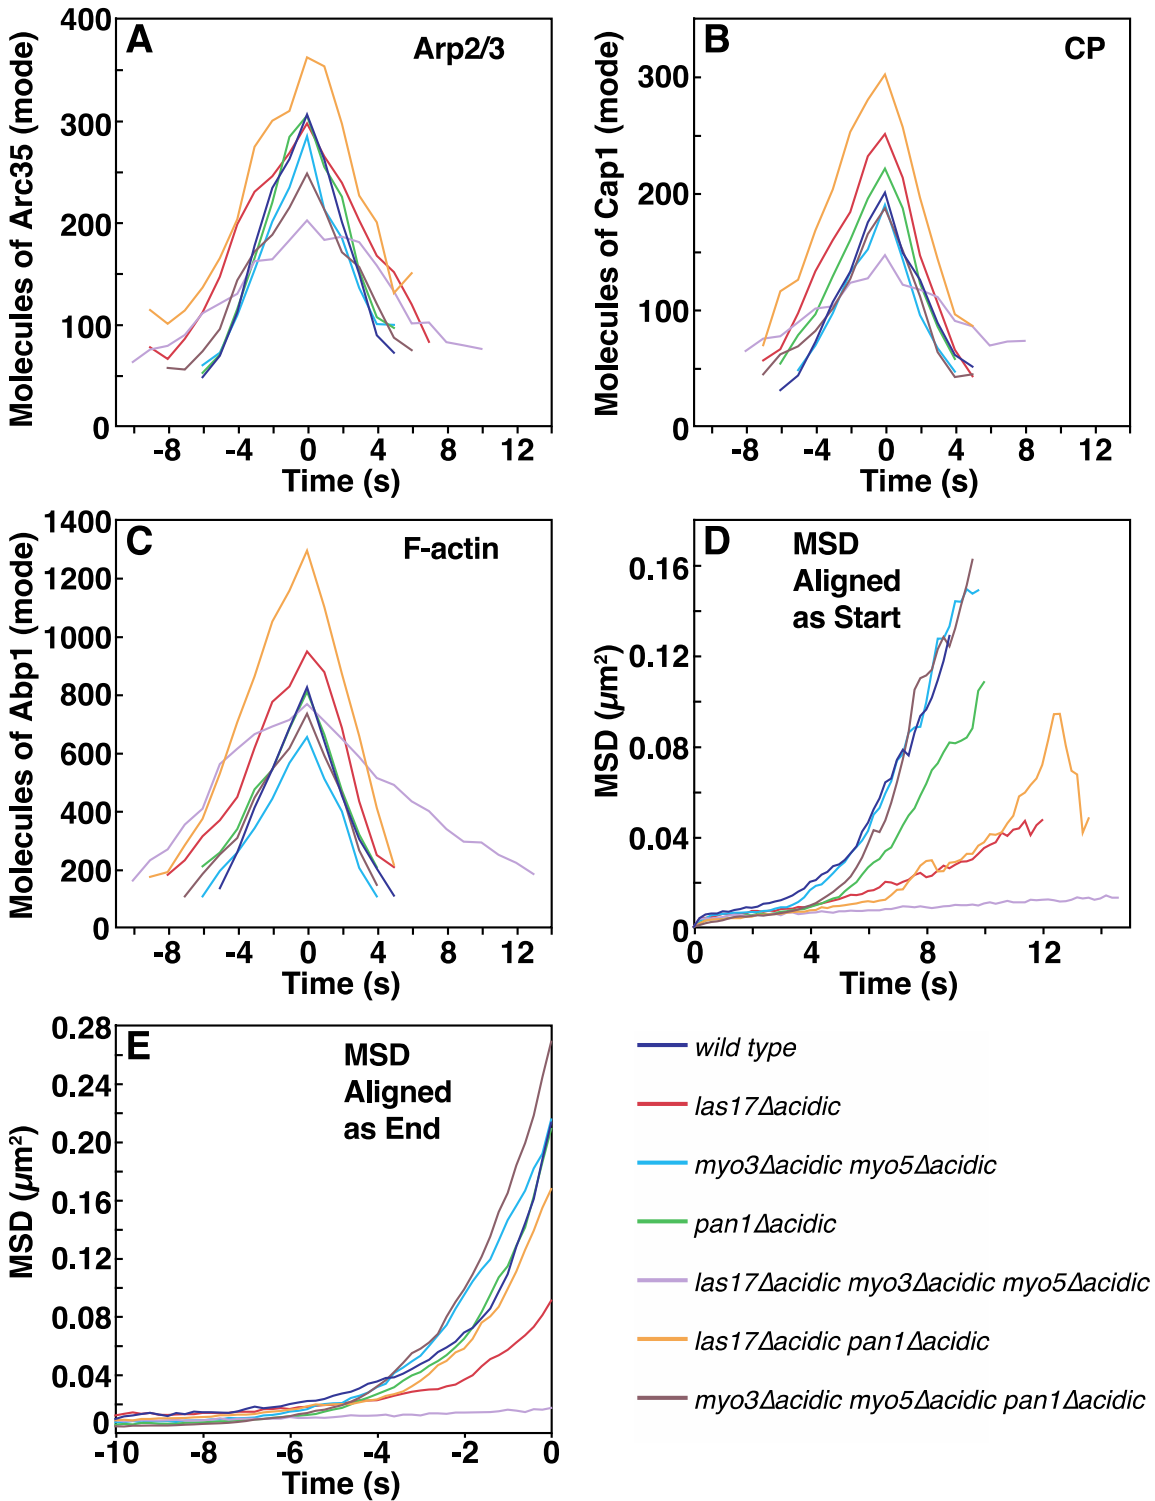

**Table S1. Yeast strains used in this study.**

| Strain  | Genotype                                                                                            | Source     |
|---------|-----------------------------------------------------------------------------------------------------|------------|
| BY4741  | <i>MATa his3Δ1 leu2Δ0 met15Δ0 ura3Δ0</i>                                                            | (2)        |
| YJC6494 | <i>MATα/MATa his3Δ1/his3Δ1 leu2Δ0/leu2Δ0 met15Δ0/met15Δ0 ura3Δ0/ura3Δ0</i>                          | This study |
| YJC6718 | <i>MATa Abp1-GFP-SpHIS5 his3Δ1 leu2Δ0 met15Δ0 ura3Δ0</i>                                            | This study |
| YJC6719 | <i>MATα Abp1-GFP-SpHIS5 his3Δ1 leu2Δ0 met15Δ0 ura3Δ0</i>                                            | This study |
| YJC6720 | <i>MATa Abp1-GFP-SpHIS5 his3Δ1 leu2Δ0 met15Δ0 ura3Δ0</i>                                            | This study |
| YJC6721 | <i>MATα Abp1-GFP-SpHIS5 his3Δ1 las17Δacidic-CaURA3MX4 leu2Δ0 met15Δ0 ura3Δ0</i>                     | This study |
| YJC6722 | <i>MATα Abp1-GFP-SpHIS5 his3Δ1 las17Δacidic-CaURA3MX4 leu2Δ0 met15Δ0 ura3Δ0</i>                     | This study |
| YJC6723 | <i>MATa Abp1-GFP-SpHIS5 his3Δ1 las17Δacidic-CaURA3MX4 leu2Δ0 met15Δ0 ura3Δ0</i>                     | This study |
| YJC6725 | <i>MATa Cse4-GFP-SpHIS5 his3Δ1 leu2Δ0 met15Δ0 ura3Δ0</i>                                            | This study |
| YJC6726 | <i>MATα Cse4-GFP-SpHIS5 his3Δ1 leu2Δ0 met15Δ0 ura3Δ0</i>                                            | This study |
| YJC6756 | <i>MATa Arc35-GFP-SpHIS5 his3Δ1 leu2Δ0 met15Δ0 ura3Δ0</i>                                           | This study |
| YJC6757 | <i>MATa Arc35-GFP-SpHIS5 his3Δ1 leu2Δ0 met15Δ0 ura3Δ0</i>                                           | This study |
| YJC6758 | <i>MATα Arc35-GFP-SpHIS5 his3Δ1 leu2Δ0 met15Δ0 ura3Δ0</i>                                           | This study |
| YJC6759 | <i>MATa Arc35-GFP-SpHIS5 his3Δ1 las17Δacidic-CaURA3MX4 leu2Δ0 met15Δ0 ura3Δ0</i>                    | This study |
| YJC6760 | <i>MATa Arc35-GFP-SpHIS5 his3Δ1 las17Δacidic-CaURA3MX4 leu2Δ0 met15Δ0 ura3Δ0</i>                    | This study |
| YJC6761 | <i>MATα Arc35-GFP-SpHIS5 his3Δ1 las17Δacidic-CaURA3MX4 leu2Δ0 met15Δ0 ura3Δ0</i>                    | This study |
| YJC6804 | <i>MATa Cap1-GFP-SpHIS5 his3Δ1 leu2Δ0 met15Δ0 ura3Δ0</i>                                            | This study |
| YJC6805 | <i>MATα Cap1-GFP-SpHIS5 his3Δ1 leu2Δ0 met15Δ0 ura3Δ0</i>                                            | This study |
| YJC6806 | <i>MATa Cap1-GFP-SpHIS5 his3Δ1 leu2Δ0 met15Δ0 ura3Δ0</i>                                            | This study |
| YJC6807 | <i>MATa Cap1-GFP-SpHIS5 las17Δacidic-CaURA3MX4 his3Δ1 leu2Δ0 met15Δ0 ura3Δ0</i>                     | This study |
| YJC6808 | <i>MATa Cap1-GFP-SpHIS5 las17Δacidic-CaURA3MX4 his3Δ1 leu2Δ0 met15Δ0 ura3Δ0</i>                     | This study |
| YJC6809 | <i>MATα Cap1-GFP-SpHIS5 las17Δacidic-CaURA3MX4 his3Δ1 leu2Δ0 met15Δ0 ura3Δ0</i>                     | This study |
| YJC6958 | <i>MATa Abp1-GFP-SpHIS5 his3Δ1 leu2Δ0 met15Δ0 pan1Δacidic-kanMX6 ura3Δ0</i>                         | This study |
| YJC6959 | <i>MATa Abp1-GFP-SpHIS5 his3Δ1 leu2Δ0 met15Δ0 pan1Δacidic-kanMX6 ura3Δ0</i>                         | This study |
| YJC6960 | <i>MATα Abp1-GFP-SpHIS5 his3Δ1 leu2Δ0 met15Δ0 pan1Δacidic-kanMX6 ura3Δ0</i>                         | This study |
| YJC6961 | <i>MATa Abp1-GFP-SpHIS5 his3Δ1 las17Δacidic-CaURA3MX4 leu2Δ0 met15Δ0 pan1Δacidic-kanMX6 ura3Δ0</i>  | This study |
| YJC6962 | <i>MATa Abp1-GFP-SpHIS5 his3Δ1 las17Δacidic-CaURA3MX4 leu2Δ0 met15Δ0 pan1Δacidic-kanMX6 ura3Δ0</i>  | This study |
| YJC6963 | <i>MATα Abp1-GFP-SpHIS5 his3Δ1 las17Δacidic-CaURA3MX4 leu2Δ0 met15Δ0 pan1Δacidic-kanMX6 ura3Δ0</i>  | This study |
| YJC7024 | <i>MATa Cap1-GFP-SpHIS5 his3Δ1 leu2Δ0 met15Δ0 pan1Δacidic-kanMX6 ura3Δ0</i>                         | This study |
| YJC7025 | <i>MATa Cap1-GFP-SpHIS5 his3Δ1 leu2Δ0 met15Δ0 pan1Δacidic-kanMX6 ura3Δ0</i>                         | This study |
| YJC7026 | <i>MATα Cap1-GFP-SpHIS5 his3Δ1 leu2Δ0 met15Δ0 pan1Δacidic-kanMX6 ura3Δ0</i>                         | This study |
| YJC7027 | <i>MATa Cap1-GFP-SpHIS5 his3Δ1 las17Δacidic-CaURA3MX4 leu2Δ0 met15Δ0 pan1Δacidic-kanMX6 ura3Δ0</i>  | This study |
| YJC7028 | <i>MATa Cap1-GFP-SpHIS5 his3Δ1 las17Δacidic-CaURA3MX4 leu2Δ0 met15Δ0 pan1Δacidic-kanMX6 ura3Δ0</i>  | This study |
| YJC7029 | <i>MATα Cap1-GFP-SpHIS5 his3Δ1 las17Δacidic-CaURA3MX4 leu2Δ0 met15Δ0 pan1Δacidic-kanMX6 ura3Δ0</i>  | This study |
| YJC7102 | <i>MATa Arc35-GFP-SpHIS5 his3Δ1 leu2Δ0 met15Δ0 pan1Δacidic-kanMX6 ura3Δ0</i>                        | This study |
| YJC7103 | <i>MATa Arc35-GFP-SpHIS5 his3Δ1 leu2Δ0 met15Δ0 pan1Δacidic-kanMX6 ura3Δ0</i>                        | This study |
| YJC7104 | <i>MATa Arc35-GFP-SpHIS5 his3Δ1 las17Δacidic-CaURA3MX4 leu2Δ0 met15Δ0 pan1Δacidic-kanMX6 ura3Δ0</i> | This study |
| YJC7105 | <i>MATα Arc35-GFP-SpHIS5 his3Δ1 las17Δacidic-CaURA3MX4 leu2Δ0 met15Δ0 pan1Δacidic-kanMX6</i>        | This study |



| Strain | Genotype                         | Source |
|--------|----------------------------------|--------|
|        | <i>pan1Δacidic-kanMX6 ura3Δ0</i> |        |

Table S2. Peak number of molecules. The mode  $\pm$  standard error of the mode, median, mean and 90% confidence interval (C.I.) are listed. N is the number of actin patches analyzed.

| Genotype                                                      | Arc35          |        |      |          |     | Cap1           |        |      |          |     | Abp1           |        |      |           |     |
|---------------------------------------------------------------|----------------|--------|------|----------|-----|----------------|--------|------|----------|-----|----------------|--------|------|-----------|-----|
|                                                               | Mode $\pm$ SEM | Median | Mean | 90% C.I. | N   | Mode $\pm$ SEM | Median | Mean | 90% C.I. | N   | Mode $\pm$ SEM | Median | Mean | 90% C.I.  | N   |
| <i>wild type</i>                                              | 305 $\pm$ 17   | 330    | 360  | 346-374  | 331 | 200 $\pm$ 14   | 215    | 233  | 224-242  | 313 | 822 $\pm$ 67   | 933    | 1026 | 980-1073  | 323 |
| <i>las17Δa</i>                                                | 296 $\pm$ 13   | 360    | 458  | 430-486  | 247 | 250 $\pm$ 18   | 289    | 314  | 302-326  | 310 | 945 $\pm$ 66   | 1121   | 1287 | 1225-1349 | 305 |
| <i>myo3Δa</i><br><i>myo5Δa</i>                                | 284 $\pm$ 17   | 336    | 366  | 349-383  | 273 | 190 $\pm$ 11   | 211    | 229  | 220-238  | 268 | 650 $\pm$ 39   | 740    | 844  | 800-887   | 245 |
| <i>pan1Δa</i>                                                 | 303 $\pm$ 33   | 334    | 363  | 342-382  | 244 | 220 $\pm$ 13   | 232    | 249  | 238-260  | 255 | 807 $\pm$ 71   | 926    | 1034 | 992-1077  | 370 |
| <i>las17Δa</i><br><i>pan1Δa</i>                               | 361 $\pm$ 53   | 560    | 678  | 622-735  | 155 | 301 $\pm$ 38   | 366    | 401  | 382-421  | 218 | 1292 $\pm$ 113 | 1574   | 1774 | 1658-1890 | 181 |
| <i>myo3Δa</i><br><i>myo5Δa</i><br><i>pan1Δa</i>               | 247 $\pm$ 8    | 257    | 287  | 275-300  | 277 | 187 $\pm$ 10   | 190    | 198  | 189-206  | 186 | 731 $\pm$ 80   | 838    | 933  | 881-986   | 216 |
| <i>las17Δa</i><br><i>myo3Δa</i><br><i>myo5Δa</i> <sup>a</sup> | 201 $\pm$ 19   | 233    | 259  | 244-274  | 157 | 146 $\pm$ 12   | 190    | 219  | 208-230  | 267 | 765 $\pm$ 61   | 1040   | 1195 | 1113-1278 | 184 |

<sup>a</sup> For Arc35 measurements, *las17Δacidic myo5Δacidic* cells were used.

Table S3. Ratios of peak protein levels, based on mode of numbers of molecules.

| Genotype                                                 | Cap1/Arc35 | Abp1/Arc35 | Abp1/CP |
|----------------------------------------------------------|------------|------------|---------|
| <i>wild type</i>                                         | 0.66       | 2.7        | 4.1     |
| <i>las17Δacidic</i>                                      | 0.84       | 3.2        | 3.8     |
| <i>myo3Δacidic myo5Δacidic</i>                           | 0.67       | 2.3        | 3.4     |
| <i>pan1Δacidic</i>                                       | 0.73       | 2.7        | 3.7     |
| <i>las17Δacidic pan1Δacidic</i>                          | 0.83       | 3.6        | 4.3     |
| <i>myo3Δacidic myo5Δacidic pan1Δacidic</i>               | 0.75       | 3.0        | 3.9     |
| <i>las17Δacidic myo3Δacidic myo5Δacidic</i> <sup>a</sup> | 0.72       | 3.8        | 5.2     |

<sup>a</sup> For Arc35 measurements, *las17Δacidic myo5Δacidic* cells were used.

Table S4. Rate of Assembly (molecules/second). The mode and one standard error of the mode are listed. N is the number of actin patches analyzed.

| Genotype                                                      | Arc35          |        |      |           |     | Cap1           |        |      |           |     | Abp1           |        |      |          |     |
|---------------------------------------------------------------|----------------|--------|------|-----------|-----|----------------|--------|------|-----------|-----|----------------|--------|------|----------|-----|
|                                                               | Mode $\pm$ SEM | Median | Mean | 90% C.I.  | N   | Mode $\pm$ SEM | Median | Mean | 90% C.I.  | N   | Mode $\pm$ SEM | Median | Mean | 90% C.I. | N   |
| <i>wild type</i>                                              | 44.0 $\pm$ 3.2 | 51.6   | 57.6 | 55.2-59.9 | 331 | 31.0 $\pm$ 1.9 | 34.7   | 38.4 | 36.8-39.9 | 313 | 129 $\pm$ 14   | 160    | 188  | 176-199  | 323 |
| <i>las17Δa</i>                                                | 36.6 $\pm$ 2.5 | 41.9   | 48.3 | 45.7-50.9 | 247 | 33.8 $\pm$ 2.0 | 37.7   | 42.3 | 40.3-44.4 | 310 | 114 $\pm$ 14   | 146    | 166  | 157-175  | 305 |
| <i>myo3Δa</i><br><i>myo5Δa</i>                                | 43.9 $\pm$ 3.7 | 50.7   | 57.6 | 54.7-60.1 | 273 | 33.9 $\pm$ 2.7 | 37.2   | 40.8 | 38.7-42.8 | 268 | 101 $\pm$ 6    | 123    | 142  | 134-150  | 245 |
| <i>pan1Δa</i>                                                 | 48.9 $\pm$ 2.9 | 56.2   | 62.0 | 58.6-65.3 | 244 | 32.4 $\pm$ 2.2 | 35.5   | 40.0 | 37.8-42.1 | 255 | 130 $\pm$ 5    | 151    | 178  | 169-187  | 370 |
| <i>las17Δa</i><br><i>pan1Δa</i>                               | 37.5 $\pm$ 6.5 | 59.5   | 74.7 | 68.1-81.2 | 155 | 43.2 $\pm$ 2.4 | 47.2   | 52.6 | 50.0-55.2 | 218 | 158 $\pm$ 18   | 182    | 206  | 192-220  | 181 |
| <i>myo3Δa</i><br><i>myo5Δa</i><br><i>pan1Δa</i>               | 25.8 $\pm$ 2.9 | 33.4   | 36.5 | 34.8-38.2 | 277 | 19.0 $\pm$ 2.0 | 22.6   | 24.5 | 23.1-25.8 | 186 | 96 $\pm$ 8     | 117    | 137  | 128-146  | 216 |
| <i>las17Δa</i><br><i>myo3Δa</i><br><i>myo5Δa</i> <sup>a</sup> | 18.1 $\pm$ 1.7 | 20.8   | 23.8 | 22.1-25.4 | 157 | 17.3 $\pm$ 1.6 | 22.0   | 24.4 | 23.2-25.6 | 267 | 85 $\pm$ 18    | 113    | 118  | 111-124  | 184 |

<sup>a</sup> For Arc35 measurements, *las17Δacidic myo5Δacidic* cells were used.

Table S5. Rate of Disassembly (molecules/second). The mode and one standard error of the mode are listed. N is the number of actin patches analyzed.

| Genotype                                                      | Arc35       |        |      |           |     | Cap1       |        |      |           |     | Abp1       |        |      |          |     |
|---------------------------------------------------------------|-------------|--------|------|-----------|-----|------------|--------|------|-----------|-----|------------|--------|------|----------|-----|
|                                                               | Mode ± SEM  | Median | Mean | 90% C.I.  | N   | Mode ± SEM | Median | Mean | 90% C.I.  | N   | Mode ± SEM | Median | Mean | 90% C.I. | N   |
| <i>wild type</i>                                              | 56.9 ± 4.0  | 63.6   | 74.2 | 70.4-78.0 | 331 | 34.3 ± 3.2 | 42.3   | 49.9 | 47.0-52.7 | 313 | 152 ± 9    | 182    | 219  | 207-231  | 323 |
| <i>las17Δa</i>                                                | 37.7 ± 3.4  | 51.5   | 59.1 | 55.7-62.5 | 247 | 44.7 ± 5.0 | 54.5   | 60.9 | 57.7-64.2 | 310 | 179 ± 14   | 220    | 254  | 239-268  | 305 |
| <i>myo3Δa</i><br><i>myo5Δa</i>                                | 44.5 ± 4.3  | 65.7   | 79.4 | 74.4-84.5 | 273 | 37.3 ± 2.8 | 48.3   | 57.1 | 53.8-60.4 | 268 | 147 ± 14   | 171    | 204  | 191-219  | 245 |
| <i>pan1Δa</i>                                                 | 53.8 ± 3.8  | 64.0   | 77.2 | 72.4-82.0 | 244 | 38.4 ± 4.8 | 46.9   | 54.5 | 51.1-57.9 | 255 | 158 ± 17   | 196    | 226  | 216-237  | 370 |
| <i>las17Δa</i><br><i>pan1Δa</i>                               | 60.1 ± 13.2 | 90.2   | 112  | 100-124   | 155 | 51.5 ± 6.8 | 67.9   | 76.6 | 71.9-81.3 | 218 | 222 ± 22   | 273    | 324  | 300-349  | 181 |
| <i>myo3Δa</i><br><i>myo5Δa</i><br><i>pan1Δa</i>               | 32.9 ± 3.6  | 39.0   | 45.6 | 42.8-48.4 | 277 | 28.4 ± 2.2 | 33.6   | 39.0 | 36.5-41.5 | 186 | 166 ± 23   | 187    | 202  | 190-215  | 216 |
| <i>las17Δa</i><br><i>myo3Δa</i><br><i>myo5Δa</i> <sup>a</sup> | 20.7 ± 1.1  | 21.4   | 22.7 | 21.3-24.1 | 157 | 16.4 ± 2.3 | 21.1   | 26.0 | 24.1-27.9 | 267 | 69 ± 6     | 78     | 99   | 90-108   | 184 |

<sup>a</sup> For Arc35 measurements, *las17Δacidic myo5Δacidic* cells were used.

Table S6. Time of Assembly (seconds). The mode and one standard error of the mode are listed. N is the number of actin patches analyzed.

| Genotype                                                      | Arc35      |        |      |          |     | Cap1       |        |      |          |     | Abp1       |        |      |          |     |
|---------------------------------------------------------------|------------|--------|------|----------|-----|------------|--------|------|----------|-----|------------|--------|------|----------|-----|
|                                                               | Mode ± SEM | Median | Mean | 90% C.I. | N   | Mode ± SEM | Median | Mean | 90% C.I. | N   | Mode ± SEM | Median | Mean | 90% C.I. | N   |
| <i>wild type</i>                                              | 5.8 ± 0.3  | 6      | 6.4  | 6.2-6.6  | 331 | 5.6 ± 0.3  | 6      | 6.0  | 5.9-6.2  | 313 | 5.2 ± 0.3  | 6      | 5.9  | 5.7-6.0  | 323 |
| <i>las17Δa</i>                                                | 7.4 ± 0.3  | 9      | 9.1  | 8.8-9.4  | 247 | 7.2 ± 0.3  | 7      | 7.5  | 7.2-7.7  | 310 | 7.4 ± 0.3  | 8      | 8.1  | 7.9-8.3  | 305 |
| <i>myo3Δa</i><br><i>myo5Δa</i>                                | 5.9 ± 0.3  | 6      | 6.5  | 6.3-6.8  | 273 | 5.3 ± 0.2  | 5      | 5.6  | 5.5-5.8  | 268 | 5.7 ± 0.5  | 6      | 6.2  | 6.0-6.3  | 245 |
| <i>pan1Δa</i>                                                 | 5.2 ± 0.3  | 6      | 6.0  | 5.8-6.2  | 244 | 5.9 ± 0.3  | 6      | 6.3  | 6.1-6.5  | 255 | 5.3 ± 0.3  | 6      | 6.2  | 6.1-6.4  | 370 |
| <i>las17Δa</i><br><i>pan1Δa</i>                               | 9.1 ± 0.5  | 9      | 9.1  | 8.8-9.5  | 155 | 7.4 ± 0.5  | 7      | 7.5  | 7.3-7.8  | 218 | 8.9 ± 0.2  | 9      | 9.5  | 9.1-9.9  | 181 |
| <i>myo3Δa</i><br><i>myo5Δa</i><br><i>pan1Δa</i>               | 7.1 ± 0.5  | 7      | 7.8  | 7.5-8.0  | 277 | 6.7 ± 0.4  | 7      | 7.6  | 7.4-7.9  | 186 | 7.0 ± 0.2  | 7      | 7.2  | 6.9-7.4  | 216 |
| <i>las17Δa</i><br><i>myo3Δa</i><br><i>myo5Δa</i> <sup>a</sup> | 7.8 ± 0.6  | 9      | 10.1 | 9.6-10.6 | 157 | 6.3 ± 0.5  | 7      | 7.6  | 7.3-7.9  | 267 | 9.1 ± 0.6  | 9      | 9.5  | 9.1-10.0 | 184 |

<sup>a</sup> For Arc35 measurements, *las17Δacidic myo5Δacidic* cells were used.

Table S7. Time of Disassembly (seconds). The mode and one standard error of the mode are listed. N is the number of actin patches analyzed.

| Genotype                                                      | Arc35      |        |      |          |     | Cap1       |        |      |          |     | Abp1       |        |      |           |     |
|---------------------------------------------------------------|------------|--------|------|----------|-----|------------|--------|------|----------|-----|------------|--------|------|-----------|-----|
|                                                               | Mode ± SEM | Median | Mean | 90% C.I. | N   | Mode ± SEM | Median | Mean | 90% C.I. | N   | Mode ± SEM | Median | Mean | 90% C.I.  | N   |
| <i>wild type</i>                                              | 5.0 ± 0.1  | 5      | 5.1  | 5.0-5.2  | 331 | 4.5 ± 0.3  | 5      | 5.1  | 4.9-5.3  | 313 | 5.2 ± 0.4  | 6      | 5.2  | 5.0-5.3   | 323 |
| <i>las17Δa</i>                                                | 6.2 ± 0.2  | 7      | 7.5  | 7.2-7.7  | 247 | 5.2 ± 0.2  | 5      | 5.6  | 5.4-5.8  | 310 | 5.0 ± 0.2  | 5      | 5.7  | 5.5-5.9   | 305 |
| <i>myo3Δa</i><br><i>myo5Δa</i>                                | 4.2 ± 0.3  | 5      | 5.0  | 4.8-5.1  | 273 | 4.3 ± 0.3  | 4      | 4.5  | 4.3-4.6  | 268 | 4.6 ± 0.3  | 5      | 4.8  | 4.6-5.0   | 245 |
| <i>pan1Δa</i>                                                 | 4.2 ± 0.2  | 5      | 4.8  | 4.7-5.0  | 244 | 4.5 ± 0.3  | 5      | 4.9  | 4.7-5.0  | 255 | 4.9 ± 0.1  | 5      | 5.1  | 5.0-5.3   | 370 |
| <i>las17Δa</i><br><i>pan1Δa</i>                               | 5.6 ± 0.3  | 6      | 6.3  | 6.0-6.6  | 155 | 5.3 ± 0.3  | 5      | 5.5  | 5.3-5.7  | 218 | 5.3 ± 0.3  | 6      | 6.2  | 5.8-6.4   | 181 |
| <i>myo3Δa</i><br><i>myo5Δa</i><br><i>pan1Δa</i>               | 5.2 ± 0.3  | 6      | 6.5  | 6.3-6.8  | 277 | 5.0 ± 0.1  | 5      | 5.3  | 5.1-5.5  | 186 | 4.2 ± 0.2  | 5      | 5.2  | 5.0-5.5   | 216 |
| <i>las17Δa</i><br><i>myo3Δa</i><br><i>myo5Δa</i> <sup>a</sup> | 9.1 ± 0.6  | 10     | 10.2 | 9.8-10.6 | 157 | 7.5 ± 0.3  | 8      | 7.8  | 7.5-8.1  | 267 | 10.0 ± 0.7 | 11     | 11.9 | 11.3-12.4 | 184 |

<sup>a</sup> For Arc35 measurements, *las17Δacidic myo5Δacidic* cells were used.

## Supporting References

1. Galletta, B.J., D.Y. Chuang, and J.A. Cooper. 2008. Distinct Roles for Arp2/3 Regulators in Actin Assembly and Endocytosis. *PLoS Biol.* 6:e1.
2. Brachmann, C.B., A. Davies, G.J. Cost, E. Caputo, J. Li, P. Hieter, and J.D. Boeke. 1998. Designer deletion strains derived from *Saccharomyces cerevisiae* S288C: a useful set of strains and plasmids for PCR-mediated gene disruption and other applications. *Yeast.* 14:115-132.
